# Supplementary material for: Realizing broadband sub-wavelength focusing and a high intensity enhancement with a space-time synergetic modulated acoustic prison
Source: Royal Society of Chemistry journal article supplement (doi:10.1039/d0tc01984d), 2020-01-01
Supplement: d0tc01984d1.pdf [file d0tc01984d1.pdf]

# Realizing broadband sub-wavelength focusing and high intensity enhancement by space-time synergetic modulated acoustic prison

Fuyin Ma<sup>1,2\*</sup>, Jianyu Chen<sup>1</sup>, Jiu Hui Wu<sup>1,2</sup>, Han Jia<sup>3\*</sup>

(1. School of Mechanical Engineering, Xi'an Jiaotong University, Xi'an 71009, China;

2. State Key Laboratory for Strength and Vibration of Mechanical Structure, Xi'an Jiaotong University, Xi'an 71009, China;

3. Key Laboratory of Noise and Vibration Research, Institute of Acoustics, Chinese Academy of Sciences, Beijing 100190, China)

## Supplementary Figures

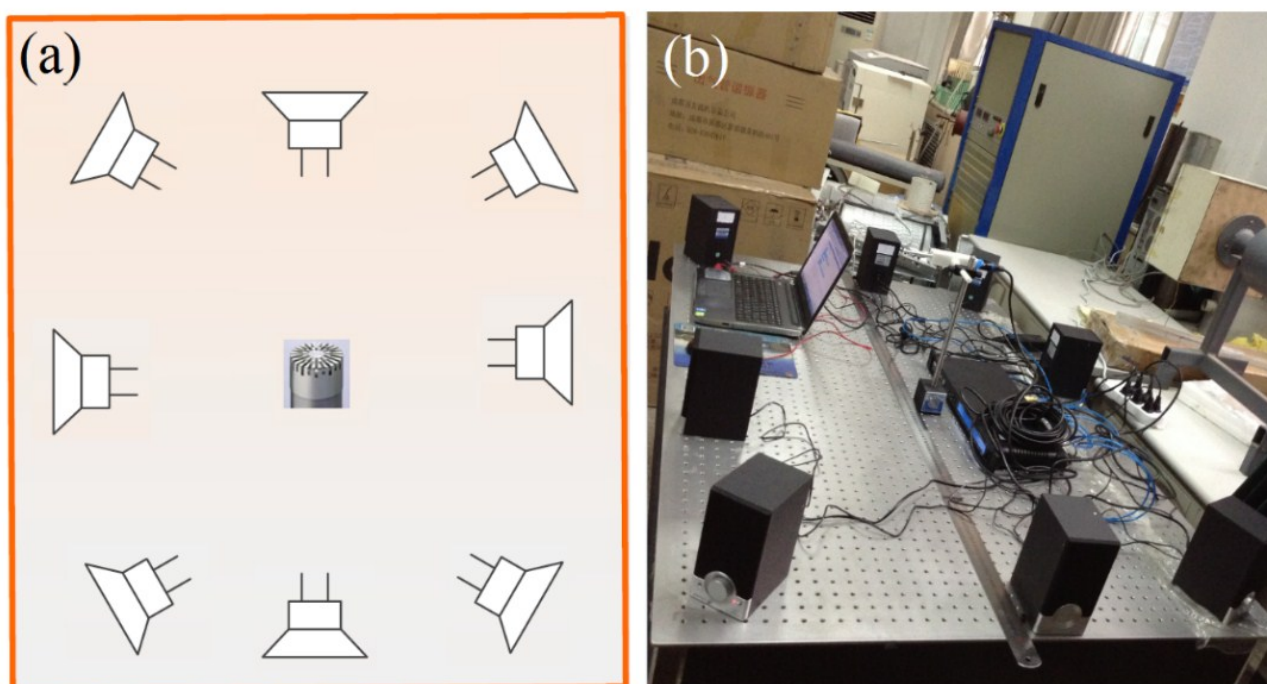

**Supplementary Fig. 1** (a) Schematic diagram of time-reversal focusing in a reverberant room with 8 speakers and a microphone; (b) setup photograph of the time-reversal focus experiment.

## Supplementary materials

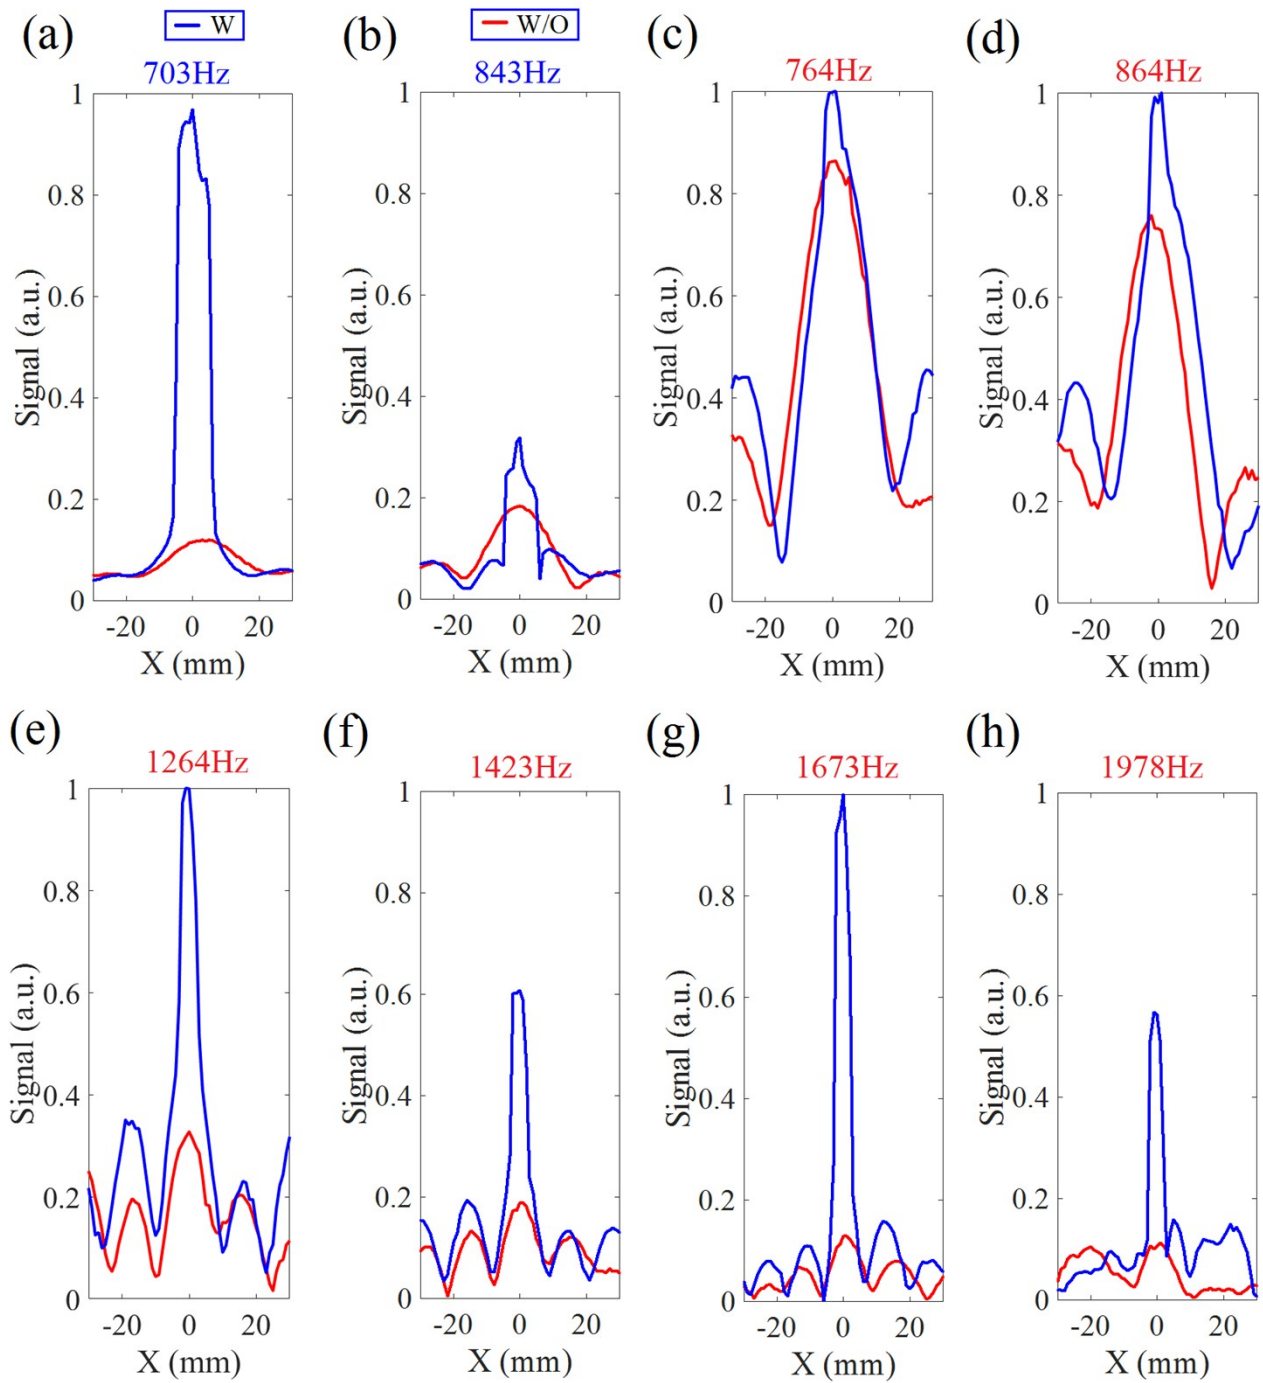

**Supplementary Fig. 2** The focusing effect of the spectrum peaks at (a) 703 Hz and (b) 843 Hz for the group that adds a prism with side length of 100 mm; the results at (c) 764 Hz, (d) 864 Hz, (e) 1264 Hz, (f) 1423 Hz, (g) 1673 Hz and (h) 1978 Hz for the group that adds a prism with side length of 50 mm. It can be seen that the width of the main peak does not change with frequency, demonstrating a stable broadband sub-wavelength focusing feature.

## Supplementary materials

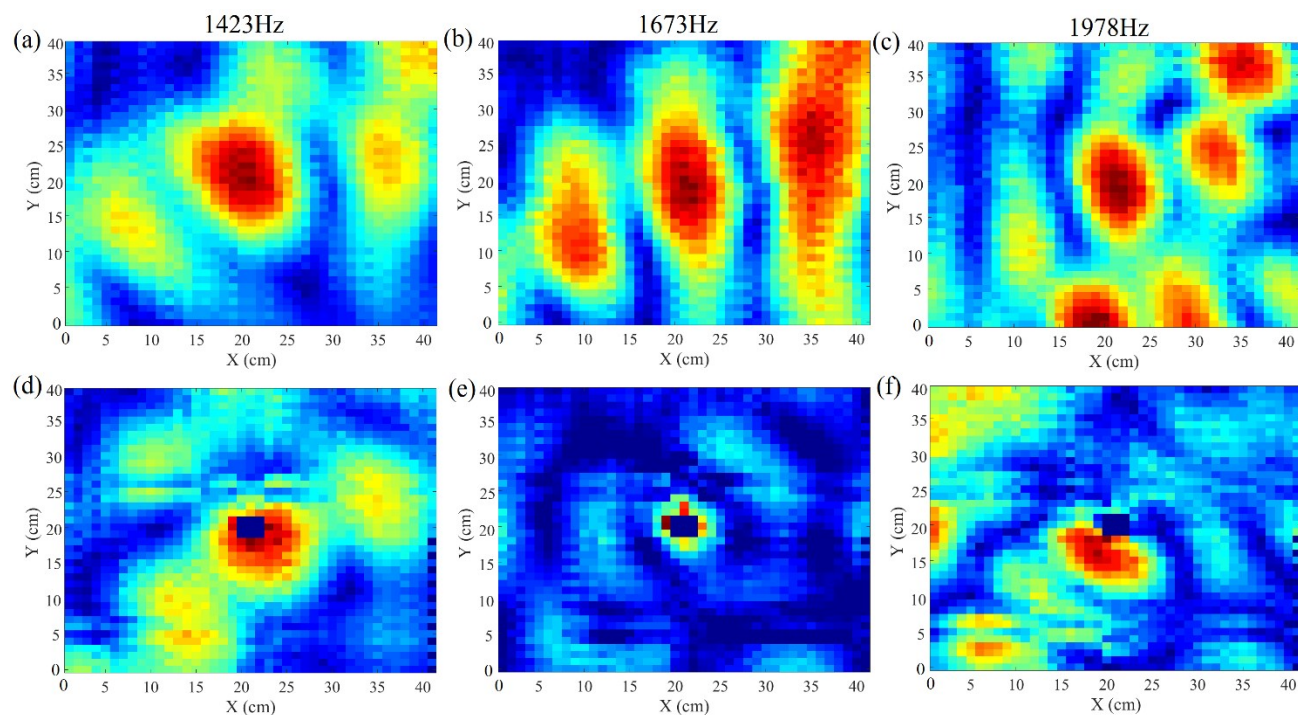

**Supplementary Figure 3.** The planar sound distributions of the control group (upper row) at (a) 1423 Hz, (b) 1673 Hz and (c) 1978 Hz; those of the group that adding an acoustic prison with side length of 50 mm in the focus center at (d) 1423 Hz, (e) 1673 Hz and (f) 1978 Hz.

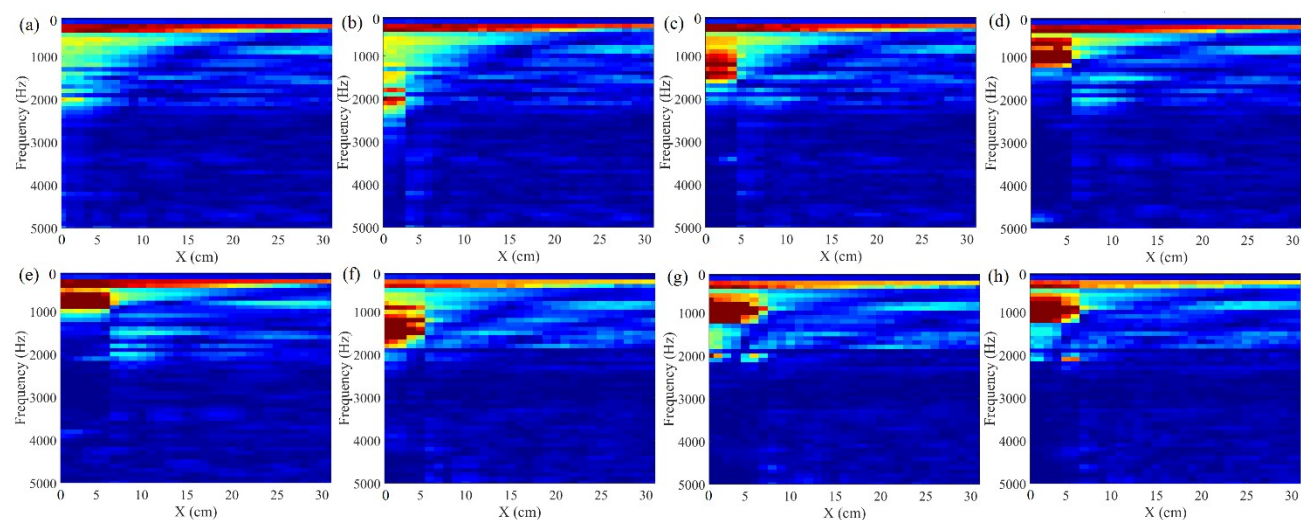

**Supplementary Figure 4.** The planar focusing measurement results of (a) Group-1, (b) Group-2, (c) Group-3, (d) Group-4, (e) Group-5, (f) Group-6, (g) Group-7, and (h) Group-8 in the frequency range of 100-5000 Hz.
